# Supplementary material for: Balancing interlayer spacing, pore structures and conductivity endows hard carbon with high capacity for rechargeable aluminum batteries
Source: Royal Society of Chemistry journal article supplement (doi:10.1039/d4cp01415d), 2024-01-01
Supplement: d4cp01415d1.pdf [file d4cp01415d1.pdf]

## **Balancing interlayer spacing, pore structures and conductivity endows hard carbon with high capacity for rechargeable aluminum batteries**

Shuang Li <sup>a</sup>, Zeyu Zhang <sup>b</sup>, Fei Yuan <sup>b</sup>, Zhen Wang <sup>a,\*</sup>, Bo Wang <sup>b,\*</sup>

<sup>a</sup> *Hebei Vocational University of Industry and Technology, Shijiazhuang 050000, China. E-mail:*

*gzdwangzhen@126.com*

<sup>b</sup> *Hebei Key Laboratory of Flexible Functional Materials, School of Materials Science and Engineering, Hebei University of Science and Technology, Shijiazhuang 050000, China. E-mail:*

*wangbo1996@gmail.com*

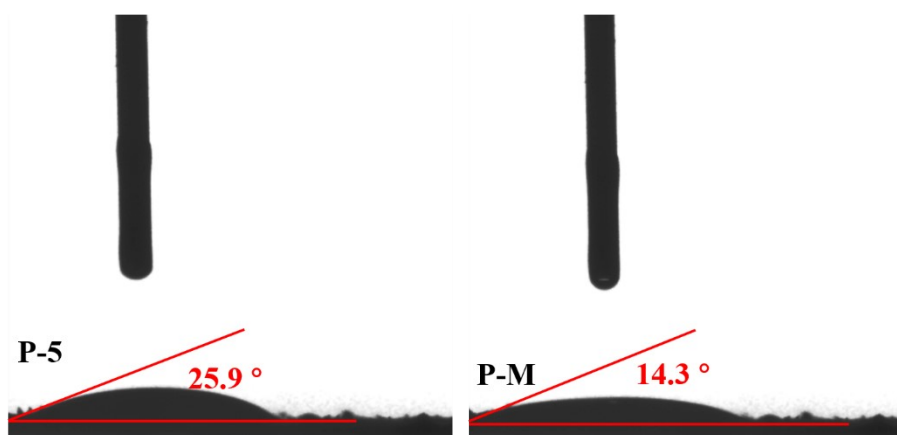

**Figure S1.** Contact angle test of P-5 and P-M.

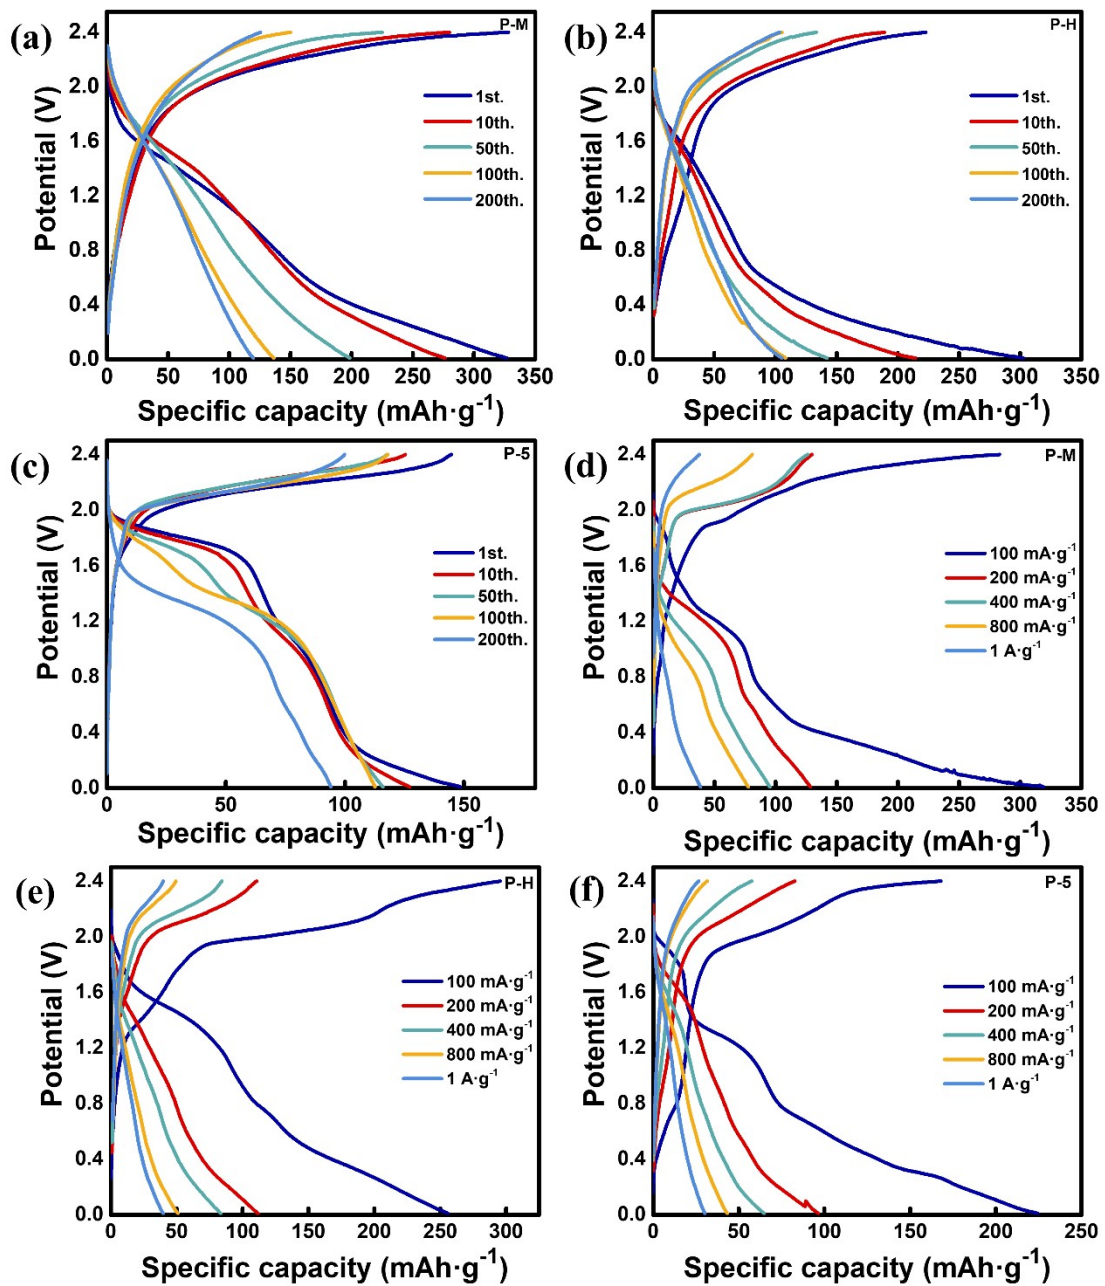

**Figure S2.** Galvanostatic charge/discharge curves of (a) P-M, (b) P-H, and (c) P-5 at  $500 \text{ mA}\cdot\text{g}^{-1}$  after various cycles. Galvanostatic charge/discharge curves of (d) P-M, (e) P-H, and (f) P-5 at different current densities.

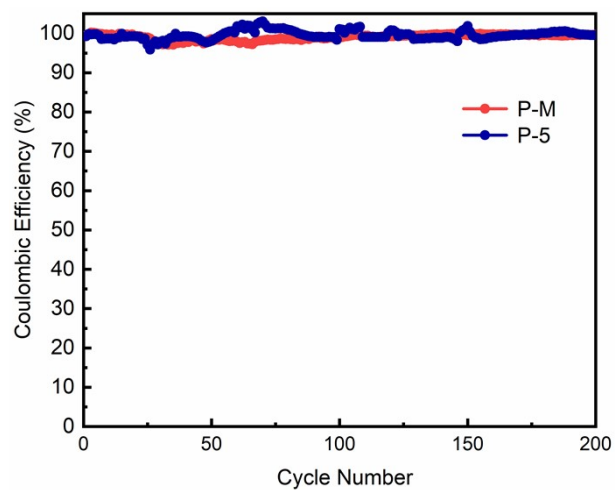

**Figure S3.** Coulombic Efficiency of P-5 and P-M at  $500 \text{ mA}\cdot\text{g}^{-1}$ .

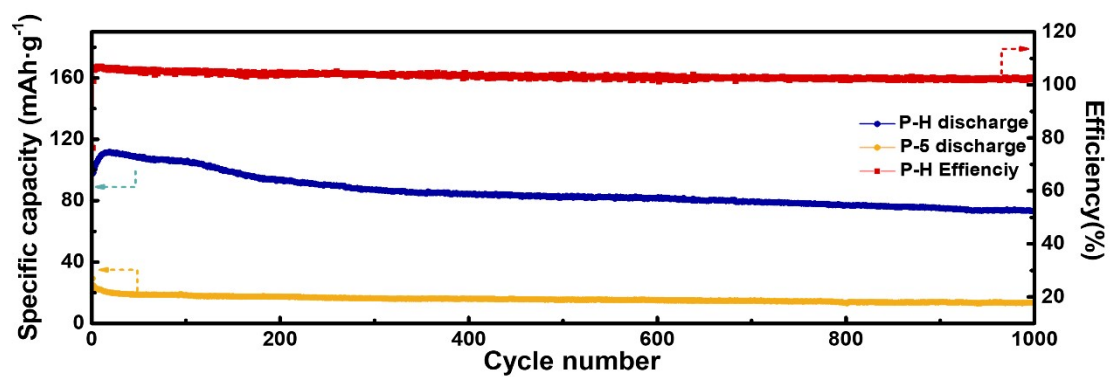

**Figure S4.** Cycling stability of P-H and P-5 at 1 A·g<sup>-1</sup> after 1000 cycles.

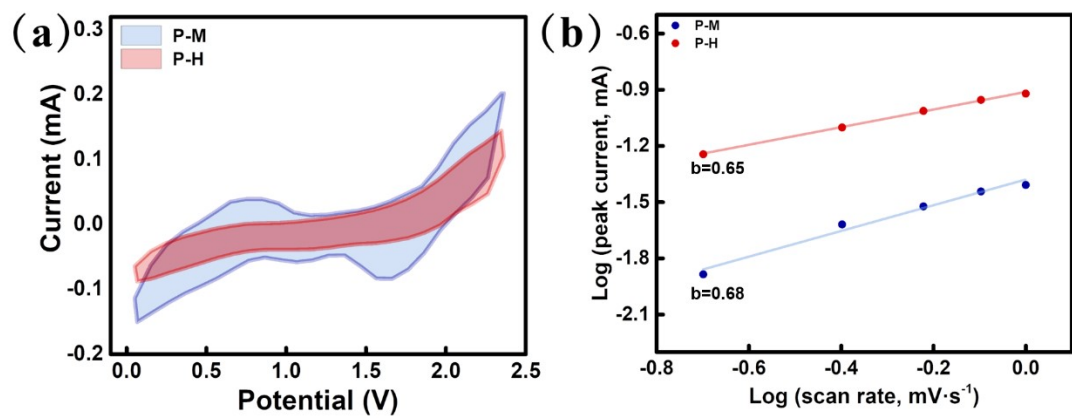

**Figure S5.** (a) CV curves of P-H and P-M at 1.0 mV/s. (b) b value of P-H and P-M

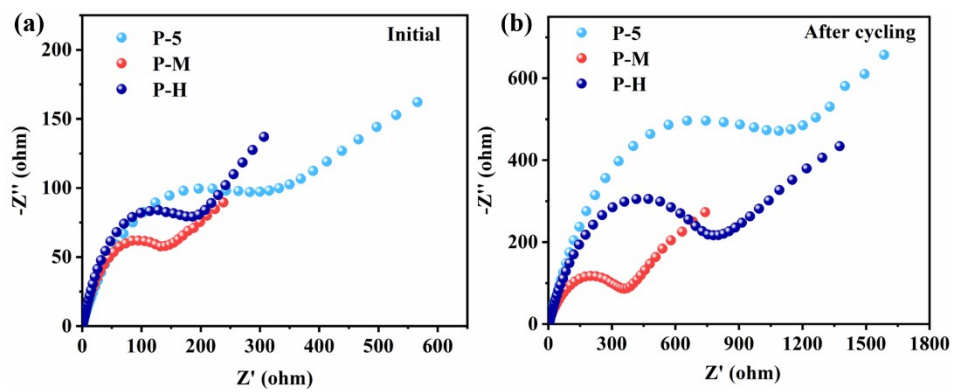

**Figure S6.** the Nyquist plot of P-5, P-M, and P-H 9 (a) before and (b) after cycling at  $500 \text{ mA} \cdot \text{g}^{-1}$ .

**Table S1.** Electrical conductivity tests of P-5, P-H, and P-M.

| <b>Site</b>          | <b>Electrical conductivity (s/cm)</b> |       |       |
|----------------------|---------------------------------------|-------|-------|
|                      | P-5                                   | P-H   | P-M   |
| <b>Site 1</b>        | 0.724                                 | 1.288 | 1.292 |
| <b>Site 2</b>        | 0.721                                 | 1.289 | 1.294 |
| <b>Site 3</b>        | 0.721                                 | 1.290 | 1.293 |
| <b>Average value</b> | 0.722                                 | 1.289 | 1.292 |



**Table S2.** Elemental analysis of P-5, P-H, and P-M.

| <b>Materials</b> | <b>Elemental analysis (at.%)</b> |      |      |
|------------------|----------------------------------|------|------|
|                  | C                                | O    | N    |
| P-5              | 89.6                             | 10.4 | -    |
| P-H              | 94.6                             | 3.36 | 2.04 |
| P-M              | 90.23                            | 4.26 | 5.51 |

**Table S3.** Electrical performances of various carbon materials

| Materials                                              | Specific capacity/mAh·g <sup>-1</sup><br>(I/mA·g <sup>-1</sup> ) | Cycling performance                      |              |                                     |
|--------------------------------------------------------|------------------------------------------------------------------|------------------------------------------|--------------|-------------------------------------|
|                                                        |                                                                  | Current density<br>(mA·g <sup>-1</sup> ) | Cycle number | Capacity<br>(mA h·g <sup>-1</sup> ) |
| P-M                                                    | 323(500)                                                         | 1000                                     | 1000         | 109                                 |
| FNG[1]                                                 | 300(60)                                                          | 60                                       | 40           | 225                                 |
| Natural graphite[2]                                    | 110(99)                                                          | 660                                      | 6000         | 60                                  |
| EG[3]<br>(expanded graphite)                           | 110(1000)                                                        | 5000                                     | 27500        | 100                                 |
| SG[3]<br>(synthetic graphite)                          | 152.5(500)                                                       | 5000                                     | 500          | 75.5                                |
| Nanosheet-bricked<br>PG[4]<br>(porous graphite)        | 104(1000)                                                        | 100000                                   | 3000         | 90                                  |
| CG[5]<br>(commercial<br>graphite)                      | 101(1000)                                                        | 5000                                     | 30000        | 60                                  |
| 3D GF[6]<br>(graphitic foam)                           | 90(1000)                                                         | 1200                                     | 4000         | 60                                  |
| 3D GMN[7]<br>(graphene network)                        | 56(3000)                                                         | 2400                                     | 200          | 57                                  |
| Defect-free GA[8]                                      | 97(50000)                                                        | 5000                                     | 25000        | 100 ± 3                             |
| FLG[9]<br>(few-layer graphene)                         | 173(1000)                                                        | 10000                                    | 5000         | 78                                  |
| TLG[10]<br>(three-layer<br>graphene)                   | 197(200)                                                         | 5000                                     | 1000         | 147                                 |
| GF@CFC[11]<br>(carbon fiber cloth)                     | 140(100)                                                         | 3000                                     | 300          | 60                                  |
| CMK-3[12]<br>(commercial ordered<br>mesoporous carbon) | 32(270)                                                          | 980                                      | 36000        | 28                                  |
| CMK-8[13]                                              | 100.5(300)                                                       | 2000                                     | 30000        | 46.4                                |
| Coconut PAC[14]<br>(porous activated<br>carbon)        | 150(100)                                                         | 1000                                     | 1500         | 80                                  |
| CNF[15]<br>(commercial carbon<br>nanofiber)            | 95(50000)                                                        | 10000                                    | 20000        | 105                                 |
| MoS <sub>2</sub> / MNC[16]<br>(N-doped carbon)         | 191.2(500)                                                       | 1000                                     | 1700         | 127.5                               |
| NC@ZnSe[17]                                            | 172(300)                                                         | 500                                      | 250          | 60                                  |

## Reference

- [1] J.V. Rani, V. Kanakaiah, T. Dadmal, et al., Fluorinated Natural Graphite Cathode for Rechargeable Ionic Liquid Based Aluminum-Ion Battery, *Journal of The Electrochemical Society*. 2013, 160: A1781–A1784.
- [2] M.C. Lin, M. Gong, B. Lu, et al., An ultrafast rechargeable aluminium-ion battery, *Nature*. 2015, 520: 325–328.
- [3] D. Muñoz-Torrero, A. Molina, J. Palma, et al., Widely commercial carbonaceous materials as cathode for Al-ion batteries, *Carbon*. 2020, 167: 475–484.
- [4] C. Zhang, R. He, J. Zhang, et al., Amorphous Carbon-Derived Nanosheet-Bricked Porous Graphite as High-Performance Cathode for Aluminum-Ion Batteries, *ACS Applied Materials and Interfaces*. 2018, 10: 26510–26516.
- [5] X. Dong, H. Xu, H. Chen, et al., Commercial expanded graphite as high-performance cathode for low-cost aluminum-ion battery, *Carbon*. 2019, 148: 134–140.
- [6] Y. Wu, M. Gong, M.C. Lin, et al., 3D Graphitic Foams Derived from Chloroaluminate Anion Intercalation for Ultrafast Aluminum-Ion Battery, *Advanced Materials*. 2016, 28: 9218–9222.
- [7] G.Y. Yang, L. Chen, P. Jiang, et al., Fabrication of tunable 3D graphene mesh network with enhanced electrical and thermal properties for high-rate aluminum-ion battery application, *RSC Advances*. 2016, 6: 47655–47660.
- [8] H. Chen, F. Guo, Y. Liu, et al., A Defect-Free Principle for Advanced Graphene Cathode of Aluminum-Ion Battery, *Advanced Materials*. 2017, 29:.
- [9] H. Huang, F. Zhou, P. Lu, et al., Design and construction of few-layer graphene cathode for ultrafast and high-capacity aluminum-ion batteries, *Energy Storage Materials*. 2020, 27: 396–404.
- [10] Y. Kong, C. Tang, X. Huang, et al., Thermal Reductive Perforation of Graphene Cathode for High-Performance Aluminum-Ion Batteries, *Advanced Functional Materials*. 2021, 31: 1–9.
- [11] C. Liu, Z. Liu, Q. Li, et al., Binder-free ultrasonicated graphite flakes@carbon fiber cloth cathode for rechargeable aluminum-ion battery, *Journal of Power Sources*. 2019, 438: 226950.
- [12] Z.A. Zafar, S. Imtiaz, R. Li, et al., A super-long life rechargeable aluminum battery, *Solid State Ionics*. 2018, 320: 70–75.
- [13] C. Li, P.C. Rath, S.X. Lu, et al., Ordered nano-structured mesoporous CMK-8 and other carbonaceous positive electrodes for rechargeable aluminum batteries, *Chemical Engineering Journal*. 2021, 417: 129131.
- [14] P. Thanwisai, N. Chaiyapo, P. Phuenhinlad, et al., Mesoporous and defective activated carbon cathode for  $\text{AlCl}_4^-$  anion storage in non-aqueous aluminium-ion batteries, *Carbon*. 2022, 191: 195–204.
- [15] Y. Hu, S. Debnath, H. Hu, et al., Unlocking the potential of commercial carbon nanofibers as free-standing positive electrodes for flexible aluminum ion batteries, *Journal of Materials*

Chemistry A. 2019, 7: 15123–15130.

- [16] S. Guo, H. Yang, M. Liu, et al., Interlayer-Expanded MoS<sub>2</sub>/N-Doped Carbon with Three-Dimensional Hierarchical Architecture as a Cathode Material for High-Performance Aluminum-Ion Batteries, ACS Applied Energy Materials. 2021, 4: 7064–7072.
- [17] J. Li, W. Liu, Z. Yu, et al., N-doped C@ZnSe as a low cost positive electrode for aluminum-ion batteries: Better electrochemical performance with high voltage platform of ~1.8 V and new reaction mechanism, Electrochimica Acta. 2021, 370: 137790.
